1 **Actin cytoskeleton dynamics affect replication of Human Metapneumovirus**

2 Pamela Elizabeth Rodríguez<sup>1§</sup>, Pedro Ignacio Gil<sup>2§</sup>, Jorge Augusto Cámara<sup>1</sup>, Alicia Cámara<sup>1</sup>  
3 and María Gabriela Paglini<sup>\*2,3</sup>

4  
5 <sup>1</sup>Laboratory of Influenza and other Respiratory Viruses, Virology Institute “Dr. J. M. Vanella”. Facultad de Ciencias Médicas. Universidad Nacional de Córdoba. Córdoba. Córdoba. Argentina.

6  
7  
8 <sup>2</sup>Laboratory of Cell Biology of Viral Infection, Virology Institute “Dr. J. M. Vanella”. Facultad de Ciencias Médicas. Universidad Nacional de Córdoba. Córdoba. Córdoba. Argentina.

9  
10  
11 <sup>3</sup>Laboratory of Neurophysiology, Instituto de Investigación Médica Mercedes y Martín Ferreyra, INIMEC-CONICET, Universidad Nacional de Córdoba, Córdoba, Argentina.

12  
13

14 **§: Both authors contributed equally to this work.**

15

16 **\*Corresponding author.**

17 María Gabriela Paglini, Ph.D.

18 Laboratory of Cell Biology of Viral Infection, Virology Institute “Dr. J. M. Vanella”. Facultad de Ciencias Médicas. Universidad Nacional de Córdoba. Córdoba. Argentina,

19 Enfermera Gordillo s/n. Ciudad Universitaria, 5000 - Córdoba Argentina.

20 Phone: +54-351-4334022

21 E-mail: [gpaglini@immf.uncor.edu](mailto:gpaglini@immf.uncor.edu)

22  
23

24 **Running title.**

25 Human Metapneumovirus replication dynamics

26 **Keywords.**

27 Virus biology; Replication cycle; Actin filaments; Cytochalasin D; Respiratory disease.

28

29 **ABSTRACT**

30 Human metapneumovirus (hMPV) is a virus responsible for acute respiratory infection in  
31 humans with clinical and epidemiological relevance in pediatric, immunocompromised, and  
32 elderly populations. Little is known about hMPV *in vitro* replication biological processes and  
33 their relationship with cellular structures such as the cytoskeleton. Our goal was to evaluate  
34 the viral replication curve in order to study the role of the actin cytoskeleton in hMPV  
35 replication at different stages of viral growth. Human metapneumovirus was isolated in a  
36 Vero cell line from a clinical sample and identified as A<sub>2</sub> genotype. The cytopathic effect was  
37 detected by the appearance of cell rounding and refractory cell clusters. The growth curve  
38 showed that viral replication maximum level was between 48 and 72 h.p.i. The highest  
39 percentage of infected cells and intracellular hMPV-protein were detected at the early stages  
40 of the replication cycle (8 h.p.i). Disruption of actin microfilaments with cytochalasin D  
41 (CytD) during the early events of infection provoked an increase in both intracellular and  
42 extracellular viruses. We demonstrate that the early phase of the hMPV curve is crucial for  
43 viral replication. We also show that disruption of actin filaments during this time increments  
44 both viral protein expression in the cytoplasm and the release of viruses to the extracellular  
45 space. This study contributes to elucidate wild-type hMPV growth kinetics, providing new  
46 insights on the actin cytoskeleton role in viral replication mechanisms. In addition, it points  
47 out putative targets to develop new antiviral treatments.

48

## 49 INTRODUCTION

50 Human Metapneumovirus (hMPV) and Respiratory syncytial virus (RSV) cause severe  
51 respiratory diseases in infants and elderly adults (Shafagati and Williams, 2018). Both viruses  
52 belong to the *Pneumoviridae* family (Afonso et al., 2016) and no vaccine or approved  
53 antiviral therapy currently exists for hMPV. Besides, there is only one prophylactic treatment  
54 to control RSV (Kinder et al., 2020). Human Metapneumovirus is an enveloped negative-  
55 stranded RNA virus with a non-segmented genome composed of eight genes encoding for  
56 nine proteins (Ballegeer and Saelens, 2020). Two major hMPV subtypes have been described:  
57 A (A1, A2a, A2b1, A2b2) and B (B1, B2) (Afonso et al., 2016; Nao et al., 2020; Shafagati  
58 and Williams, 2018; Van Den Hoogen et al., 2001).

59 Since the discovery of hMPV (Van Den Hoogen et al., 2001), several approaches for its *in*  
60 *vitro* isolation have been followed. Viral adaptation and spread in cell cultures are difficult  
61 since both require high viral loads and successive blind passages of about 14 to 21 days to  
62 visualize the cytopathic effect (CPE), characterized by changes in cell morphology or by the  
63 formation of syncytia (Boivin et al., 2002; Chan et al., 2003; Deffrasnes et al., 2005; Jumat et  
64 al., 2014; Sato et al., 2017).

65 The viral infection cycle begins with the entry of viral particles into susceptible cells through  
66 the interaction with receptors that trigger the internalization process. Several studies have  
67 reported an important role for the cytoskeleton, particularly actin microfilaments (MFLs), in  
68 the entry and replication of numerous viruses, including hMPV, into the host cell (Cifuentes-  
69 Muñoz et al., 2020; Merwaiss et al., 2018; Najjar et al., 2016; Roberts et al., 2015). In this  
70 sense, it has been shown that actin cytoskeleton components are essential cofactors for RSV  
71 replication, spread, and morphogenesis (Kallewaard et al., 2005; Mehedi et al., 2016;  
72 Shahriari et al., 2016; Shahriari et al., 2018). Moreover, previous studies from our laboratory  
73 demonstrated that the disruption of the actin cytoskeleton during the early stage of Pixuna

74 virus (PIXV) replication, increased the extracellular viral yields, probably promoting  
75 endocytosis and thus increasing the entry of viral particles (Gil et al., 2017).

76 Despite the importance of hMPV as an etiological agent of human respiratory pathologies, the  
77 mechanisms of interaction between the virus and the host cell to secure infection remain  
78 largely unexplored. In the present study, we examined the role of the actin cytoskeleton in  
79 hMPV replication at different stages of viral growth. To this end, we isolated and identified  
80 hMPV circulating in Cordoba, Argentina. Furthermore, we describe the hMPV replication  
81 curve and characterize the subcellular expression of viral proteins at different times after  
82 infection. We demonstrate that actin depolymerization at the early phase of the hMPV  
83 replication curve is crucial for a successful viral replication. The presence of cytochalasin D  
84 (CytD) during this period increased viral protein expression in the cytoplasm and also the  
85 release of viruses to the extracellular space.

86 Considering that hMPV causes a severe disease, identifying the molecular mechanisms  
87 underlying its replication cycle broadens our understanding of the cell biology of viral  
88 infection. Moreover, it provides possible targets to develop new antiviral treatments.

89

## 90 **RESULTS**

### 91 **Human Metapneumovirus isolation and identification**

92 Human Metapneumovirus was isolated from nasopharyngeal aspirates of hospitalized young  
93 children in Cordoba, Argentina. The isolated virus replicated in cultures of Vero cells in the  
94 third passage at 14 d.p.i., after two blind passages of 21 days each one. The viral CPE was  
95 characterized by cell rounding, detachment, and formation of refractory cell clusters (Fig.  
96 1A). In order to confirm that the CPE was caused by hMPV, immunofluorescence (IF)  
97 detection was performed on infected monolayers. The presence of specific hMPV proteins

98 was observed at 4, 7, and 14 d.p.i. located and distributed in the cell cytoplasm presenting a  
99 dotted pattern (Fig. 1B). Simultaneously, virus genome detection by nucleic acid  
100 amplification assays (RT-PCR) from supernatants of infected Vero cell cultures collected at 4,  
101 7, and 14 d.p.i. were positive for the amplification of the 199 bp N protein fragment (Fig. 1C),  
102 confirming the presence of hMPV in supernatants of infected Vero cells. To typify viral  
103 isolation, a maximum likelihood tree was built, based on the amplified region of the gene for  
104 the fusion protein (F). The Cordoba/ARG/3864/2015 local isolated strain (access no:  
105 MN117139) was identified as A<sub>2</sub> hMPV and grouped with Canada and The Netherlands  
106 prototype strains, and with sequences from Argentina (Galiano et al., 2006), Peru, Brazil,  
107 United States, China, and Italy (Fig. 1F).

108 As previously reported, a common feature of *Pneumovirus* and *Paramyxovirus* infection is the  
109 formation of punctate areas of concentrated viral proteins called viral inclusion bodies  
110 (Cifuentes-muñoz et al., 2017). Thus, different subcellular localization of big fluorescent dots  
111 were observed several times after infection (Fig. 1B and D) whereas by confocal microscopy,  
112 small dots were detected between 0 and 96 h.p.i. in the subcortical area enriched in actin  
113 filaments (Fig. 1E, low panel).

114

### 115 **The hMPV replication cycle**

116 In order to describe the hMPV growth curve, extracellular viral production over time was  
117 evaluated by qRT-PCR expressed as the number of copies of RNA/μl of culture supernatant.  
118 The progressive increase in the number of copies of RNA was observed until 72 h.p.i., with a  
119 maximum of 4,961 copies of extracellular viral RNA/μl of supernatant (Fig. 2A, plot right  
120 axis). The time course of hMPV infection was also studied by IF. The presence of viral  
121 proteins was quantified as the number of fluorescent dots/infected cell (Fig. 2A, plot left axis  
122 and C). Interestingly, the number of fluorescent dots/infected cell decreased while the number

123 of copies of RNA/ $\mu$ l of culture supernatant increased. At 72 h.p.i. the maximum extracellular  
124 viral yield corresponded to the minimum number of fluorescent dots in the cytoplasm, as well  
125 as to the lowest percentage of infected cells (Fig. 2A and B). It is important to highlight that  
126 the percentage of infected cells decreased significantly and progressively from 24 h.p.i. until  
127 the end of the experiment (Fig. 2 B and C).

128 Taken together, our results demonstrate that the highest percentage of infected cells and  
129 intracellular hMPV-protein contents were detected at the early phase of the replication cycle.  
130 While the cycle progressed, hMPV immunostaining decreased whereas extracellular RNA  
131 viral copies increased due to the release of the viral progeny.

132

### 133 **Perturbation of actin microfilaments at different stages of the viral cycle affects hMPV** 134 **replication**

135 Previous studies have reported that the cytoskeleton, particularly the actin microfilaments  
136 (MFLs), plays an important role during the entry and replication of numerous viruses into the  
137 host cell (Cifuentes-Muñoz et al., 2020). Therefore, we studied the role of MFLs at early and  
138 late stages of hMPV infection cycle. For this purpose, disruption of actin polymerization was  
139 performed using CytD at different times during hMPV infection cycle. We first determined  
140 the participation of MFLs during the entry of the virus into the cell and at its early stages of  
141 replication. To this end, CytD was applied during virus infection (2 hours), during the first 8  
142 h.p.i. and during the first 24 h.p.i.

143 Treatment with CytD during the early stages of the replication cycle prevented the above  
144 mentioned significant decrease in the number of infected cells, regardless of whether the drug  
145 was applied during infection or during the first 8 or 24 h.p.i., thus maintaining the initial  
146 percentage of infected cells (Fig. 3A and B). Interestingly, CytD treatment during the first 24  
147 h.p.i., also prevented the dramatic diminution in the percentage of infected cells at 72 h.p.i.

148 compared to controls (Fig. 3 B). To obtain a quantitative measure of CytD effect on F viral  
149 protein expression at the different stages of the viral replication cycle, we quantified the  
150 number of fluorescent dots/infected cell.

151 Treatment with CytD during infection or during the first 8 h.p.i. caused a significant increase  
152 in fluorescent dots per infected cell compared to controls (vehicle). In particular, during the  
153 first 8 h of drug treatment a 2 to 2.5 fold increase was observed at both analyzed times (8 and  
154 24 h.p.i.) (Fig. 3 A and C). When CytD was applied during the first 24 h.p.i., and quantified at  
155 the end of the treatment, no significant differences in the number of fluorescent dots per  
156 infected cells was observed compared to controls, however, incubation with the drug  
157 prevented the loss of viral protein detected in control cells at 72 h.p.i. (Fig. 3 C).

158 Finally, to determine virus yields in the extracellular medium, we quantified the number of  
159 viral RNA copies in the culture supernatant (Figure 3 D). CytD treatment during the infection  
160 period and during the first 8 h.p.i significantly increased viral production at 24 h.p.i. (see the  
161 accumulated value). On the other hand, CytD treatment during the first 24 h.p.i., caused a  
162 significant decrease in extracellular RNA viral copies at 24 h.p.i. This reduction in  
163 extracellular RNA viral copies remained unchanged up to 72 h.p.i., as can be observed in the  
164 accumulated values (Fig. 3 D).

165 In addition, we focused on the late stage of the replication curve and observed that CytD  
166 applied during the last 24 h.p.i (48-72 h.p.i) caused no changes in the percentage of infected  
167 cells, in the number of dots/infected cell or in the number of extracellular RNA viral copies  
168 compared to vehicle controls (data not shown).

169 Altogether, these data suggest that the first 8 hours of the hMPV infection curve are crucial  
170 for viral replication. Moreover, they show that the presence of CytD during this period results  
171 in an increment of viral protein expression in the cell cytoplasm and also in the release of  
172 viruses to the extracellular space.

173

## 174 **DISCUSSION**

175 In this study we report the first successful isolation of hMPV performed in a Vero-CCL cell  
176 line obtained from a positive clinical sample in Cordoba city, Argentina. We identified this  
177 local strain and described the viral replication curve showing that the maximum viral  
178 production takes place at 72 h.p.i. Moreover, we demonstrate that the disruption of actin MFL  
179 at the early stages of infection increases both intra- and extracellular viral production.

180 The viral isolate was identified as A<sub>2</sub> hMPV subtype by phylogenetic analysis. This result  
181 agrees with our previous studies where we have reported circulation of the A<sub>2</sub> hMPV subtype  
182 in Argentina (Rodriguez et al., 2020). In addition, co-circulation of this subtype with other  
183 genotypes such as A<sub>1</sub>, B<sub>1</sub>, and B<sub>2</sub> have been previously reported (Galiano et al., 2006; Velez  
184 Rueda et al., 2013). Notwithstanding, genotype predominance also depends on factors suchs  
185 as epidemiological year and region, host immunity and susceptibility (Choe et al., 2020; Kim  
186 et al., 2010; Zhang et al., 2012a; Zhou et al., 2020). The A<sub>2</sub> genotype is clinically relevant  
187 because it may cause diseases of varying severity. Moreover, this genotype has been reported  
188 to cause very severe conditions as pneumonia and hypoxia, leading to more admissions in  
189 intensive care units compared to the other subtypes (Arnott et al., 2013; Vicente et al., 2006).

190 The isolation of A<sub>2</sub> hMPV viral strain, showed the first signs of CPE in the third blind  
191 passage, at 14 d.p.i, characterized by cell rounding and formation of refractive corsages of  
192 cells, similarly to what has been previously reported (Abiko et al., 2007; Boivin et al., 2002;  
193 Chan et al., 2003; Deffrasnes et al., 2005; Kinder et al., 2020). In contrast, other authors have  
194 described that hMPV can appear as a syncytium (Bernal et al., 2019; Sato et al., 2017; Van  
195 Den Hoogen et al., 2001; Yang et al., 2016) such as RSV (member of the same family) and  
196 this difference in CPE may be related to the cell lines that were infected (e.g. LLC-MK2) or  
197 to the viral genotype (Jumat et al., 2014; Nao et al., 2019; Reina et al., 2007; Tollefson et al.,



198 2010; Williams et al., 2005; Zhang et al., 2012b). It is important to highlight that numerous  
199 authors report that hMPV isolation is difficult (Deffrasnes et al., 2005; Jumat et al., 2014; Lee  
200 et al., 2019; Loo et al., 2013; Schowalter et al., 2006; Tollefson et al., 2010; Van Den Hoogen  
201 et al., 2001). In this sense, it is known that isolation of respiratory viruses from clinical  
202 specimens often show low efficiency in *in vitro* cell cultures. This low efficiency could be  
203 associated to the cell type and/or the virus subtype and its entry pathway (Cifuentes-muñoz et  
204 al., 2017; Cifuentes-Muñoz and Ellis Dutch, 2019; Cox et al., 2015; Kinder et al., 2020; Lee  
205 et al., 2019; Yang et al., 2016).

206 The hMPV strain replication curve showed an exponential phase between 48 to 72 h.p.i., the  
207 highest intracellular viral protein concentration was at 8 h.p.i. which is consistent with results  
208 obtained by other groups. Tollefson (2010) described hMPV kinetics in LLC-MK2 cells, with  
209 the eclipse phase at 24 h.p.i. and the exponential phase between 48 and 72 h.p.i. with a  
210 significant increase in viral titer. El Najjar (2016) showed maximum viral production at 72  
211 h.p.i. in BEAS-2B cells, both intra- and extracellularly. In recent years, studies with  
212 recombinant viruses in three-dimensional cultures have described similar results, both in the  
213 CPE caused by the virus and in the replicative cycle (Geiser et al., 2021; Kinder et al., 2020).  
214 All these results show that our model of infection in the Vero-CCL cell line with this wild-  
215 type virus (A<sub>2</sub> hMPV), despite its isolation difficulties, is very efficient and representative of  
216 *in vivo* infection by hMPV.

217 One of the aims of this study was to evaluate the participation of the host cell actin  
218 cytoskeleton in hMPV replication. It is known that viruses such as PIV (Gupta et al., 1998),  
219 HIV (Sasaki et al., 2004) RSV (Kallewaard et al., 2005) and PIXV (Gil et al., 2017), among  
220 others, take advantage of structures such as the cytoskeleton for entry, replication,  
221 morphogenesis and exit from the host cell. To this end, we used CytD, which binds to  
222 filamentous actin and disrupts its polymerization. Intracellularly, this drug not only prevented

223 the decrease in the percentage of hMPV-infected cells (during infection, 8 h.p.i. and 24 h.p.i.)  
224 but it also caused a significant increase in the number of fluorescent dots/infected cell,  
225 indicative of protein accumulations, in all treatments. These protein accumulations  
226 (fluorescent dots) coincide with the viral cytoplasmic structures called “inclusion bodies”  
227 (Derdowski et al., 2008; Najjar et al., 2016). According to Cifuentes-Muñoz (2017 and 2019),  
228 these represent the greatest sites of hMPV replication, specially at 24 h.p.i. In *Pneumovirus*,  
229 the formation of these structures is partially dependent on actin polymerization as reported by  
230 Kinder (2020). On the other hand, unlike Cifuentes (2017), our results show that an early  
231 treatment with CytD (8 h.p.i) also increases the extracellular viral production at this time,  
232 indicating that MFL interruption could facilitate the entry of viral particles into the host cell.  
233 This represents an increase in intracellular viral load and a decrease in virus release times,  
234 compared to the control growth curve. Notwithstanding, our results agree with Cifuentes  
235 regarding the decrease in extracellular viral load from 24 h.p.i., in this case in the treatment  
236 during the first 24 hours.

237 A series of studies suggest that hMPV is a cell-associated virus and that its efficient spread  
238 and successful infection could be related to cell-cell transmission (Kallewaard et al., 2005;  
239 Merwaiss et al., 2018; Mothes et al., 2010; Roberts et al., 2015). Actin disruption could be  
240 interrupting cell-cell transmission due to which the new virions would be looking for other  
241 routes to exit and accumulate in the extracellular environment. Therefore, actin dynamics is  
242 essential for hMPV infection since it allows the virus to spread between cells, regardless of  
243 the extracellular viral load (Najjar et al., 2016). This could explain the accumulation of viral  
244 proteins in the cell cytoplasm and the decrease of viral production in the extracellular  
245 environment after exposure to CytD for 24 h.p.i.

246 Since MFLs are involved in the transport of viral nucleocapsids and inclusion bodies to the  
247 assembly sites and in their subsequent release to the extracellular environment (Cifuentes-

248 muñoz et al., 2017; Cifuentes-Muñoz and Ellis Dutch, 2019), it is reasonable to think that  
249 short-term disruption of MFLs with CytD would facilitate internalization of viral particles  
250 into the cells. In contrast, long-term treatment with CytD (24 h.p.i), could prevent the  
251 transport of viral proteins and/or the nucleocapsid to the assembly sites, reducing the  
252 accumulation of cytoplasmic viral proteins and the extracellular viral production.

253 Despite the years since its discovery, the cell biology of hMPV infection remains poorly  
254 understood. This study broadens our knowledge on the isolation and growth curve  
255 characterization of a wild-type hMPV obtained from a clinical sample. Furthermore, the  
256 findings of this research provide new insights on hMPV infection as well as on the actin  
257 cytoskeleton role in viral replication, thus contributing to the understanding of hMPV  
258 internalization and spreading mechanisms.

259

## 260 **MATERIALS AND METHODS**

### 261 **Cell culture and Virus isolation**

262 Vero cells (Vero CCL- 81, ATCC® CCL-81) were grown in Minimum Essential Medium  
263 (MEM) (GIBCOBRL®) with 5-10% fetal bovine serum (FBS, Natocor), 1% antibiotic and  
264 antimycotic (Antibiotic Antimycotic Solution, Penicillin and Streptomycin 100X, Stabilized,  
265 GIBCO), at 37 °C and 5% CO<sub>2</sub>.

266 Human Metapneumovirus was isolated from nasopharyngeal aspirates (NPA) of hospitalized  
267 young children in Cordoba, Argentina. All procedures were complied with the principles  
268 outlined by the Declaration of Helsinki and were approved by an Independent Ethics  
269 Committee of Hospital de Niños "Santísima Trinidad" (CIEIS) Protocol: 05/2011. The  
270 volunteers who offered samples, signed written assent/consent and their personal data was  
271 kept anonymous.

272 The infection protocol was adapted from Van den Hoogen (2001). As infection medium  
273 MEM with 0.00125% trypsin (Trypsin Solution 10X, SIGMA<sup>®</sup>) was used to allow F-protein  
274 cleavage, 0.3% bovine serum albumin (BSA) (Bovine Albumin, SIGMA<sup>®</sup>) and 1% antibiotic  
275 and antimycotic (Antibiotic Antimycotic Solution, Penicillin and Streptomycin 100X,  
276 Stabilized, GIBCO). The NPA positive was diluted in 2 ml of MEM without FBS and then  
277 centrifuged at 1500 r.p.m. for 5 minutes to clean the sample (NPA supernatant). The viral  
278 inoculum was prepared with 150 µl of NPA supernatant and 50 µl of infection MEM (200 µl:  
279 final volume). Vero cells monolayers (70-80% confluence) were grown in a 24-well plate  
280 with MEM (10% FBS and 1% ATB). Twenty-four hours later, the plate was washed three  
281 times with balanced saline buffer (PBS), 200 µl of the viral inoculum was added in each well  
282 and centrifuged at 2000 r.p.m. for 15 minutes (IEC International Refrigerated Centrifuge  
283 Model: PR-2). Afterwards, the plate was incubated at 37 °C and 5% CO<sub>2</sub> for 2 hours, the  
284 monolayers were washed three times with PBS and 1 ml of infection MEM per well was  
285 added. The infection MEM was changed at 4, 7, 10, 14, 17, and 21 days post-infection (d.p.i.)  
286 and the culture supernatants were stored until processed at -70 °C. Cell cultures were  
287 observed daily for cytopathic effect by phase contrast microscopy. Three blind passages for  
288 21 days each were performed. The hMPV positive culture supernatants were then used as an  
289 infection inoculum for the following experiments.

290

## 291 **RT-PCR**

292 Viral nucleic acids were extracted with the QIAamp<sup>®</sup> Viral RNA Mini Kit (Qiagen, GmbH,  
293 Hilden, Germany) from 140 µl of culture supernatants collected following the manufacturer's  
294 instructions. RT-PCR for the detection of the hMPV N gene was used to amplify a 199 bp  
295 fragment, using the Qiagen OneStep RT-PCR kit (Qiagen, Hilden, Germany). The  
296 conventional RT-PCR was adapted from Bouscambert-Duchamp (Bouscambert-Duchamp et

297 al., 2005). We used the following hMPV primers: Fw 5'-  
298 GTGATGCACTCAAGAGATACCC-3' and Rv 5'- CATTGTTTGACCGGCCCCATAA-3',  
299 50 µM each. Cycling conditions: 30 min at 50°C and 15 min at 94°C, followed by 40 cycles of  
300 95°C for 30 sec, 58°C for 30 sec, and 72°C for 1 min, plus one final step of 72°C for 10 min.  
301 PCR products were separated by electrophoresis on a 1.5% agarose gel and visualized under  
302 UV light after ethidium bromide staining.

303

#### 304 **Indirect immunofluorescence assay**

305 To visualize both the hMPV proteins and the actin network, we infected cells grown at 60%  
306 confluence on glass coverslips during 24 hours. At different times post-infection, cells were  
307 washed three times with PBS, fixed with 4% paraformaldehyde and 120 mM sucrose (Riedel-  
308 de Haën, Sigma-Aldrich Laborchemikalien GmbH, Seelze, Germany) for 20 min at room  
309 temperature and then washed with PBS, later they were permeabilized with 0.2% Triton™  
310 X-100 (Sigma-Aldrich, St. Louis, MO) in PBS for 5 minutes at room temperature, washed  
311 three times with PBS and incubated with 5% bovine serum albumin (BSA, Sigma-Aldrich, St.  
312 Louis, MO) for one hour at room temperature. In order to detect viral proteins, cells were  
313 incubated overnight with the mouse anti-hMPV primary antibody (1/500) (IMAGEN™  
314 hMPV. Oxoid Ltd.) in 1% BSA/PBS solution at 4 °C. Then the cells were washed three times  
315 with PBS and incubated with the goat anti-mouse secondary antibody Alexa Fluor 488  
316 (1/1600) (Thermo Fisher Scientific Inc., Waltham, Massachusetts, USA) for 1 hour at room  
317 temperature. To visualize the actin filaments and nuclei, the fixed and permeabilized cells  
318 were labeled with Phalloidin-Tetramethyl rhodamine B (1/1000) (Sigma-Aldrich, St. Louis,  
319 MO) for 1 hour at room temperature and Hoesch (1X) for 5 minutes, respectively. Then, the  
320 monolayers were washed three times with PBS and the glass coverslips were mounted using  
321 Fluorsave (Calbiochem).

322

### 323 **Sequence and phylogenetic analysis**

324 The RT-PCR protocol was adapted from Van den Hoogen (Van Den Hoogen et al., 2004)  
325 to amplify a 696 bp fragment of the F gene, using the Qiagen OneStep RT-PCR kit (Qiagen,  
326 Hilden, Germany), with primers mix Fw 5'-CAATGCAGGTATAACACCAGCAATATC-3'  
327 and Rv 5'-GCAACAATTGAACTGATCTTCAGGAAAC-3' 50 $\mu$ M each. Cycling  
328 conditions: 30 min at 42 °C and 8 min at 95 °C, followed by 40 cycles of 94 °C for 1 min, 40  
329 °C for 2 min and 72 °C for 3 min, and a final step of 72 °C for 10 min. The amplified  
330 products were separated by electrophoresis on a 1% agarose gel and visualized under UV  
331 light after ethidium bromide staining.

332 The PCR product was purified with QIAquick Gel Extraction Kit (Qiagen, Hilden, Germany)  
333 according to the manufacturer's instructions and subjected to direct nucleotide sequencing  
334 reactions in both directions using the internal PCR primers by Macrogen, Inc. (Seoul, Korea).  
335 The sequence obtained was edited with MEGA 4.0.2 (Tamura et al., 2007) and an alignment  
336 was made with sequences available in the GenBank, using the ClustalW. The Maximum  
337 Likelihood tree (ML) was constructed with the PhyML 3.0 software (Université de  
338 Montpellier, Montpellier, France) (Guindon and Gascuel, 2003). The branch support was  
339 evaluated via non-parametric bootstrapping with 1000 pseudoreplicates. The nucleotide  
340 substitution model for the analyzed data set was selected according to the Akaike information  
341 criteria implemented in the ModelTest 3.7 software (University 155 of Vigo, Galicia, Spain)  
342 (Posada and Crandall, 1998). The F gene sequence was deposited in GenBank (accession no.  
343 MN117139).

344

### 345 **Viral quantification by Sybr<sup>®</sup> RT-qPCR**

346 Viral RNA copies from supernatants obtained under different experimental conditions were  
347 determined by absolute quantification in an Applied Biosystems 7500 Fast Real-time PCR  
348 system. The manufacturer's protocol was adapted for the preparation of the reaction mix  
349 (AgPath-ID™ One-Step RT-PCR Reagents, Applied Biosystems™): 2X RT-PCR Buffer=  
350 1X; Forward and reverse PCR primers= 50µM each; Syber Green (SYBR™ Green 10000X-  
351 Invitrogen S-7563) dilution 1/100= 5.0 and -5; 25X RT-PCR Enzyme Mix (ArrayScript™  
352 Reverse Transcriptase and AmpliTaq Gold® DNA Polymerase)= 1X. The final reaction  
353 volume was 25 µl, using 2.5 µl of viral RNA. Cycling conditions: 50 °C for 30 min; 45 cycles  
354 of 94 °C for 2 min 95 °C for 10 sec, 60 °C for 30 sec and 72 °C for 30 sec and a final step of  
355 72 °C for 10 min. Data were observed in real-time and analyzed with the Virtual Curve qPCR  
356 program from Applied Biosystems (Thermo Fisher Connect™). The viral load in each sample  
357 was calculated from a standard curve performed with serial dilutions (10<sup>-1</sup> to 10<sup>-12</sup>) from an  
358 hMPV N protein synthetic oligonucleotide (199 bp) (Ultramer® DNA Oligo) of known  
359 concentration (6.0219X10<sup>13</sup> copies of RNA/µl).

360

### 361 **HMPV Replication Curve**

362 Vero cells were grown at 60% confluence on glass coverslips (12 mm in 24-well plate) for 24  
363 hours and then infected with isolated hMPV (1.97x10<sup>6</sup> copies of RNA/ µl). The culture  
364 supernatants were harvested and the monolayers were fixed at different times: 8, 16, 24, 48,  
365 72, and 96 hpi. Viral RNA was extracted using the QIAamp Viral RNA Mini Kit (Qiagen,  
366 GmbH, Hilden, Germany) following the manufacturer's instructions and used for the  
367 detection and quantification of hMPV by Sybr (SYBR™ Green 10000X, Invitrogen) RT-  
368 qPCR (AgPath -ID™ One-Step RT-PCR Reagents, Applied Biosystems™). The mean  
369 number of copies of extracellular viral RNA/µl of supernatant was then calculated (Applied  
370 biosystems. Thermo Fisher Connect™).

371 The cells were processed for IF, as described in previous sections, and the number of  
372 fluorescent dots per infected cell were calculated through the analysis of fluorescence images  
373 using the ImageJ Fiji software (ImageJ 1.50c NIH. USA).

374

### 375 **Pharmacological treatment**

376 Vero cells at 60% confluence cultured on glass coverslips were infected with hMPV  
377 according to the protocol described in the previous section. Infected cells treated with  
378 Cytochalasin D (CytD) [2.5 $\mu$ M] (Gil et al., 2017) or vehicle were analyzed at different times  
379 during the viral replication cycle. Cells were exposed to CytD or vehicle during the 2  
380 infection hours, as well as throughout the first 8 h.p.i. (experimental period between 0-24  
381 h.p.i.); during the first and the last 24 hours (48-72 h.p.i) in an experimental period between  
382 0-72 h.p.i. In each case, the supernatant was removed, the cells were washed 3 times with  
383 PBS and the infection medium was added according to each treatment. Culture supernatants  
384 and harvested cells were processed for RNA extraction and viral quantification by RT-qPCR  
385 and indirect immunofluorescence, respectively.

386

### 387 **Microscopy, processing and digital image analysis**

388 Immunostained cells were visualized using a conventional inverted epi-fluorescence  
389 microscope (Olympus IX81, Olympus Corporation, Shinjuku, Tokyo). Images were taken  
390 with regular fluorescence microscopy with a CCD camera (Orca 1000, Hamamatsu Corp.,  
391 Middlesex, NJ). Images were also taken with an inverted confocal microscope FV1000  
392 (Olympus). The collection and processing of data from the images were analyzed with the  
393 ImageJ Fiji software (ImageJ 1.50c Wayne Rasband. National Institutes of Health, USA).



394 Quantification of intracellular infection was carried out by the percentage of infected cells and  
395 the number of fluorescent dots/ infected cell. Images were processed with Adobe Photoshop  
396 CS6 (Version 13.0.1.).

397

### 398 **Statistical analysis**

399 Data are representative of at least four independent experiments, values are given as mean  $\pm$   
400 standard error of the mean (SEM). Statistical analysis was carried out using Student unpaired  
401 *t*-test, or one-way ANOVA test to enable specific group comparison.  $p < 0.05$  was considered  
402 statistically significant. All data and tests were analyzed and performed using GraphPad  
403 Prism 5.0 (GraphPad Prism versión 5.00 for Windows, GraphPad).

404

### 405 **ACKNOWLEDGEMENTS**

406 We would like to thank Bernadette van den Hoogen for receiving PER in her laboratory and  
407 for advising on the viral isolation protocol; Guadalupe Carballal<sup>†</sup> and Cristina Videla for  
408 generously providing hMPV wild type positive control; Celia Frutos and Lucia Ghietto for  
409 technical assistance in Real Time RT-qPCR; Santiago Mirazo for generously providing  
410 polyclonal antibodies; Carlos Mas for technical assistance in confocal microscopy at the  
411 Centro de Micro y Nanoscopía de Córdoba, CEMINCO-CONICET-Universidad Nacional de  
412 Córdoba, Córdoba, Argentina. We particularly want to thank Miss Stella Ascheri for general  
413 technical assistance.

### 414 **COMPETING INTERESTS**

415 No competing interests declared

### 416 **FUNDING**

417 This work was supported by grants from Secretaria de Ciencia y Tecnología - Universidad  
418 Nacional de Córdoba (SECYT Cat B. N° 30820130100350CB; Cat. B. N°  
419 30820150100037CB; SECYT-Consolidar-I N° 336 20180100191CB; SECYT-Consolidar-C  
420 N° 33620180100091CB; PRIMAR-TP N° 32520170100046CB). Fundación A. J. Roemmers  
421 (2014-2016 and 2018-2020 to A.C and 2017-2019 to P.E.R). The funding sources had no  
422 involvement in the study design, data collection, analysis and interpretation, writing of the  
423 manuscript or in the decision to submit the article for publication.

#### 424 **DATA AVAILABILITY**

425 The data that support the findings of this study are available from the corresponding author  
426 [gpaglini@immf.uncor.edu] upon reasonable request

427

#### 428 **REFERENCES**

- 429 **Abiko, C., Mizuta, K., Itagaki, T., Katsushima, N., Ito, S., Matsuzaki, Y., Okamoto, M.,**  
430 **Nishimura, H., Aoki, Y., Murata, T., et al.** (2007). Outbreak of human  
431 metapneumovirus detected by use of the Vero E6 cell line in isolates collected in  
432 Yamagata, Japan, in 2004 and 2005. *J. Clin. Microbiol.* **45**, 1912–1919.
- 433 **Afonso, C. L., Gaya, K. A., Bányai, K., Yīmíng Bào, Basler, C. F., Bavari, S., Bejerman,**  
434 **N., Blasdell, K. R., Briand, F.-X., Briese, T., et al.** (2016). TAXONOMY OF THE  
435 ORDER MONONEGAVIRALES: UPDATE 2016. *Arch Virol.* **161**, 2351–2360.
- 436 **Arnott, A., Vong, S., Sek, M., Naughtin, M., Beauté, J., Rith, S., Guillard, B., Deubel, V.**  
437 **and Buchy, P.** (2013). Genetic variability of human metapneumovirus amongst an all  
438 ages population in Cambodia between 2007 and 2009. *Infect. Genet. Evol.* **15**, 43–52.
- 439 **Ballegeer, M. and Saelens, X.** (2020). Cell-Mediated Responses to Human

- 440 Metapneumovirus Infection. *Viruses* **12**, 3–22.
- 441 **Bernal, L. J., Velandia-Romero, M., Guevara, C. and Castellanos, J. E.** (2019). Human  
442 Metapneumovirus: Laboratory Methods for Isolation, Propagation, and Plaque Titration.  
443 *Intervirology* **61**, 301–306.
- 444 **Boivin, G., Abed, Y., Pelletier, G., Ruel, L., Moisan, D., Côté, S., Peret, T. C. T.,**  
445 **Erdman, D. D. and Anderson, L. J.** (2002). Virological Features and Clinical  
446 Manifestations Associated with Human Metapneumovirus: A New Paramyxovirus  
447 Responsible for Acute Respiratory Tract Infections in All Age Groups. *J. Infect. Dis.*  
448 **186**, 1330–1334.
- 449 **Bouscambert-Duchamp, M., Lina, B., Trompette, A., Moret, H., Motte, J. and**  
450 **Andréoletti, L.** (2005). Detection of human metapneumovirus RNA sequences in  
451 nasopharyngeal aspirates of young french children with acute bronchiolitis by real-time  
452 reverse transcriptase PCR and phylogenetic analysis. *J. Clin. Microbiol.* **43**, 1411–1414.
- 453 **Chan, P. K. S., Tam, J. S., Lam, C., Chan, E., Wu, A., Li, C., Buckley, T. A., Ng, K.,**  
454 **Joynt, G. M., Cheng, F. W. T., et al.** (2003). Human Metapneumovirus Detection in  
455 Patients with Severe Acute Respiratory Syndrome. *Emerg. Infect. Dis.* **9**, 1058–1063.
- 456 **Choe, P. G., Kang, C. K., Suh, H. J., Jung, J., Kang, E., Lee, S. Y., Song, K.-H., Kim, H.**  
457 **Bin, Kim, N. J., Park, W. B., et al.** (2020). Antibody Responses to SARS-CoV-2 at 8  
458 Weeks Postinfection in Asymptomatic Patients. *Emerg. Infect. Dis.* **26**,.
- 459 **Cifuentes-muñoz, N., Brantje, J., Slaughter, K. B. and Dutch, R. E.** (2017). Human  
460 Metapneumovirus Induces Transcription. *J. Virol.* **91**, 1–18.
- 461 **Cifuentes-Muñoz, N. and Ellis Dutch, R.** (2019). To assemble or not to assemble: The  
462 changing rules of pneumovirus transmission. *Virus Res.* **265**, 68–73.

- 463 **Cifuentes-Muñoz, N., Najjar, F. El and Dutch, R. E.** (2020). Viral cell-to-cell spread:  
464 Conventional and non-conventional ways. In *Advances in Virus Research*, pp. 5985–125.
- 465 **Cox, R. G., Mainou, B. A., Johnson, M., Hastings, A. K., Schuster, J. E., Dermody, T. S.**  
466 **and Williams, J. V.** (2015). Human Metapneumovirus Is Capable of Entering Cells by  
467 Fusion with Endosomal Membranes. *PLoS Pathog.* **11**, 1–29.
- 468 **Deffrasnes, C., Côté, S. and Boivin, G.** (2005). Analysis of Replication Kinetics of the  
469 Human Metapneumovirus in Different Cell Lines by Real-Time PCR. *J. Clin. Microbiol.*  
470 **43**, 488–490.
- 471 **Derdowski, A., Peters, T. R., Glover, N., Qian, R., Utley, T. J., Burnett, A., Williams, J.**  
472 **V., Spearman, P. and Crowe, J. E.** (2008). Human metapneumovirus nucleoprotein  
473 and phosphoprotein interact and provide the minimal requirements for inclusion body  
474 formation. *J. Gen. Virol.* **89**, 2698–2708.
- 475 **Galiano, M., Trento, A., Ver, L., Carballal, G. and Videla, C.** (2006). Genetic  
476 Heterogeneity of G and F Protein Genes From Argentinean Human Metapneumovirus  
477 Strains. *J. Med. Virol.* **78**, 631–637.
- 478 **Geiser, J., Boivin, G., Huang, S., Constant, S., Kaiser, L., Tapparel, C. and Essaidi-**  
479 **Laziosi, M.** (2021). RSV and HMPV Infections in 3D Tissue Cultures: Mechanisms  
480 Involved in Virus-Host and Virus-Virus Interactions. *Viruses* **13**, 1–15.
- 481 **Gil, P. I., Albrieu-Llinás, G., Mlewski, E. C., Monetti, M., Fozzatti, L., Cuffini, C.,**  
482 **Fernández Romero, J., Kunda, P. and Paglini, M. G.** (2017). Pixuna virus modifies  
483 host cell cytoskeleton to secure infection. *Sci. Rep.* **7**, 1–9.
- 484 **Guindon, S. and Gascuel, O.** (2003). A Simple, Fast, and Accurate Algorithm to Estimate  
485 Large Phylogenies by Maximum Likelihood. *Syst. Biol.* **52**, 696–704.

- 486 **Gupta, S., De, B. P., Drazba, J. A. and Banerjee, A. K.** (1998). Involvement of actin  
487 microfilaments in the replication of human parainfluenza virus type 3. *J. Virol.* **72**,  
488 2655–2662.
- 489 **Jumat, M. R., Nguyen Huong, T., Wong, P., Loo, L. H., Tan, B. H., Fenwick, F., Toms,**  
490 **G. L. and Sugrue, R. J.** (2014). Imaging analysis of human metapneumovirus-infected  
491 cells provides evidence for the involvement of F-actin and the raft-lipid microdomains in  
492 virus morphogenesis. *Virol. J.* **11**, 1–12.
- 493 **Kallewaard, N. L., Bowen, A. L. and Crowe, J. E.** (2005). Cooperativity of actin and  
494 microtubule elements during replication of respiratory syncytial virus. *Virology* **331**, 73–  
495 81.
- 496 **Kim, C. K., Choi, J., Callaway, Z., Kim, H. Bin, Chung, J. Y., Koh, Y. Y. and Shin, B.**  
497 **M.** (2010). Clinical and epidemiological comparison of human metapneumovirus and  
498 respiratory syncytial virus in Seoul, Korea, 2003-2008. *J. Korean Med. Sci.* **25**, 342–347.
- 499 **Kinder, J. T., Moncman, C. L., Barrett, C., Jin, H., Kallewaard, N. and Dutch, R. E.**  
500 (2020). Respiratory Syncytial Virus and Human Metapneumovirus Infections in Three-  
501 Dimensional Human Airway Tissues Expose an Interesting Dichotomy in Viral  
502 Replication, Spread, and Inhibition by Neutralizing Antibodies. *J. Virol.* **94**,.
- 503 **Lee, H., Woo, H. M., Kim, K., Park, S., Park, M. S., Kim, S. S. and Kim, Y. J.** (2019).  
504 Improving pneumovirus isolation using a centrifugation and AZD1480 combined  
505 method. *J. Microbiol. Biotechnol.* **29**, 2006–2013.
- 506 **Loo, L. H., Jumat, M. R., Fu, Y., Ayi, T. C., Wong, P. S., Tee, N. W. S., Tan, B. H. and**  
507 **Sugrue, R. J.** (2013). Evidence for the interaction of the human metapneumovirus G and  
508 F proteins during virus-like particle formation. *Virol. J.* **10**, 1–13.

- 509 **Mehedi, M., McCarty, T., Martin, S. E., Le Nouën, C., Buehler, E., Chen, Y. C.,**  
510 **Smelkinson, M., Ganesan, S., Fischer, E. R., Brock, L. G., et al.** (2016). Actin-  
511 Related Protein 2 (ARP2) and Virus-Induced Filopodia Facilitate Human Respiratory  
512 Syncytial Virus Spread. *PLoS Pathog.* **12**, 1–35.
- 513 **Merwaiss, F., Czibener, C. and Alvarez, D. E.** (2018). Cell-to-cell transmission is the main  
514 mechanism supporting bovine viral diarrhea virus spread in cell culture. *J. Virol.*
- 515 **Mothes, W., Sherer, N. M., Jin, J. and Zhong, P.** (2010). Virus Cell-to-Cell Transmission.  
516 *J. Virol.* **84**, 8360–8368.
- 517 **Najjar, F. El, Cifuentes-Muñoz, N., Chen, J., Zhu, H., Buchholz, U. J., Moncman, C. L.**  
518 **and Dutch, R. E.** (2016). Human metapneumovirus Induces Reorganization of the Actin  
519 Cytoskeleton for Direct Cell-to-Cell Spread. *PLoS Pathog.* 1–30.
- 520 **Nao, N., Sato, K., Yamagishi, J., Tahara, M., Nakatsu, Y., Seki, F., Katoh, H., Ohnuma,**  
521 **A., Shirogane, Y., Hayashi, M., et al.** (2019). Consensus and variations in cell line  
522 specificity among human metapneumovirus strains. *PLoS One* **14**, 1–21.
- 523 **Nao, N., Saikusa, M., Sato, K., Sekizuka, T., Usuku, S., Tanaka, N., Nishimura, H. and**  
524 **Takeda, M.** (2020). Recent molecular evolution of human metapneumovirus (HMPV):  
525 Subdivision of HMPV a2b strains. *Microorganisms* **8**, 1–14.
- 526 **Posada, D. and Crandall, K. A.** (1998). MODELTEST: Testing the model of DNA  
527 substitution. *Bioinformatics* **14**, 817–818.
- 528 **Reina, J., Ferres, F., Alcoceba, E., Mena, A., de Gopegui, E. R. and Figuerola, J.** (2007).  
529 Comparison of different cell lines and incubation times in the isolation by the shell vial  
530 culture of human metapneumovirus from pediatric respiratory samples. *J. Clin. Virol.* **40**,  
531 46–49.

- 532 **Roberts, K. L., Manicassamy, B. and Lamb, R. A.** (2015). Influenza A Virus Uses  
533 Intercellular Connections To Spread to Neighboring Cells. *J. Virol.* **89**, 1537–1549.
- 534 **Rodriguez, P. E., Frutos, M. C., Adamo, M. P., Cuffini, C., Cámara, J. A., Paglini, M.**  
535 **G., Moreno, L. and Cámara, A.** (2020). Human Metapneumovirus: Epidemiology and  
536 genotype diversity in children and adult patients with respiratory infection in Córdoba,  
537 Argentina. *PLoS One* **15**, e0244093.
- 538 **Sasaki, H., Ozaki, H., Karaki, H. and Nonomura, Y.** (2004). Actin filaments play an  
539 essential role for transport of nascent HIV-1 proteins in host cells. *Biochem. Biophys.*  
540 *Res. Commun.* **316**, 588–593.
- 541 **Sato, K., Watanabe, O., Ohmiya, S., Chiba, F., Suzuki, A., Okamoto, M., Younghuang,**  
542 **J., Hata, A., Nonaka, H., Kitaoka, S., et al.** (2017). Efficient isolation of human  
543 metapneumovirus using MNT-1, a human malignant melanoma cell line with early and  
544 distinct cytopathic effects. *Microbiol. Immunol.* **61**, 497–506.
- 545 **Schwalter, R. M., Smith, S. E. and Dutch, R. E.** (2006). Characterization of Human  
546 Metapneumovirus F Protein-Promoted Membrane Fusion: Critical Roles for Proteolytic  
547 Processing and Low pH. *J. Virol.* **80**, 10931–10941.
- 548 **Shafagati, N. and Williams, J.** (2018). Human metapneumovirus - what we know now.  
549 *F1000Research* **7**, 1–11.
- 550 **Shahriari, S., Gordon, J. and Ghildyal, R.** (2016). Host cytoskeleton in respiratory  
551 syncytial virus assembly and budding. *Virol. J.* **13**, 1–11.
- 552 **Shahriari, S., Wei, K. J. and Ghildyal, R.** (2018). Respiratory syncytial virus matrix (M)  
553 protein interacts with actin in vitro and in cell culture. *Viruses* **10**, 7–12.
- 554 **Tamura, K., Dudley, J., Nei, M. and Kumar, S.** (2007). MEGA4: Molecular Evolutionary

- 555 Genetics Analysis (MEGA) software version 4.0. *Mol. Biol. Evol.* **24**, 1596–1599.
- 556 **Tollefson, S. J., Cox, R. G. and Williams, J. V** (2010). Studies of culture conditions and  
557 environmental stability of human metapneumovirus. *Virus Res.* **151**, 54–59.
- 558 **Van Den Hoogen, B. G., De Jong, J. C., Groen, J., Kuiken, T., De Groot, R., Fouchier, R.**  
559 **A. M. and Osterhaus, A. D. M. E.** (2001). A newly discovered human pneumovirus  
560 isolated from young children with respiratory tract disease. *Nat. Med.* **7**, 719–724.
- 561 **Van Den Hoogen, B. G., Osterhaus, D. M. E. and Fouchier, R. A. M.** (2004). Clinical  
562 impact and diagnosis of human metapneumovirus infection. *Pediatr. Infect. Dis. J.* **23**,  
563 25–32.
- 564 **Velez Rueda, A. J., Mistchenko, A. S. and Viegas, M.** (2013). Phylogenetic and  
565 Phylodynamic Analyses of Human Metapneumovirus in Buenos Aires (Argentina) for a  
566 Three-Year Period (2009-2011). *PLoS One* **8**, 1–10.
- 567 **Vicente, D., Montes, M., Cilla, G., Perez-Yarza, E. G. and Perez-Trallero, E.** (2006).  
568 Differences in clinical severity between genotype A and genotype B human  
569 metapneumovirus infection in children. *Clin. Infect. Dis.* **42**, 111–113.
- 570 **Williams, J. V, Tollefson, S. J., Johnson, J. E., Jr, J. E. C. and Crowe, J. E.** (2005). The  
571 Cotton Rat ( *Sigmodon hispidus* ) Is a Permissive Small Animal Model of Human  
572 Metapneumovirus Infection , Pathogenesis , and Protective Immunity The Cotton Rat ( *Sigmodon hispidus* ) Is a Permissive Small Animal Model of Human Metapneumovirus  
573 Infection. *J. Virol.* **79**, 10944–10951.
- 574
- 575 **Yang, H., He, H., Tan, B., Liu, E., Zhao, X. and Zhao, Y.** (2016). Human  
576 metapneumovirus uses endocytosis pathway for host cell entry. *Mol. Cell. Probes* **30**,  
577 231–237.



- 578 **Zhang, Y., Wei, Y., Li, J. and Li, J.** (2012a). Development and optimization of a direct  
579 plaque assay for human and avian metapneumoviruses. *J. Virol.* **185**, 61–68.
- 580 **Zhang, C., Du, L. N., Zhang, Z. Y., Qin, X., Yang, X., Liu, P., Chen, X., Zhao, Y., Liu, E.**  
581 **M. and Zhao, X. D.** (2012b). Detection and genetic diversity of human  
582 metapneumovirus in hospitalized children with acute respiratory infections in Southwest  
583 China. *J. Clin. Microbiol.* **50**, 2714–2719.
- 584 **Zhou, Z., Zhang, P., Cui, Y., Zhang, Y., Qin, X., Li, R., Liu, P., Dou, Y., Wang, L. and**  
585 **Zhao, Y.** (2020). Experiments Investigating the Competitive Growth Advantage of Two  
586 Different Genotypes of Human Metapneumovirus: Implications for the Alternation of  
587 Genotype Prevalence. *Sci. Rep.* **10**, 1–11.
- 588
- 589

590 **FIGURE LEGENDS**

591 **Fig. 1. Human Metapneumovirus (hMPV) isolation and identification.** A and B: Representative  
592 images of uninfected and infected VERO cells with hMPV. **A-** Images were obtained with phase  
593 contrast microscopy at low magnification, showing the viral infection cytopathic effect (CPE), which  
594 is visible at 14 d.p.i as cell rounding and shedding. Uninfected cells (top panel) and infected cells  
595 (bottom panel) at 4, 7 and 14 days d.p.i. **B-** The location of the hMPV protein through indirect  
596 immunofluorescence (see Materials and Methods), hMPV F protein (green), MFLs (red) and nuclei  
597 (blue) are shown. A temporary sequence of 4 to 14 days in non infected (top panel) and infected cells  
598 (bottom panel). **C-** Amplification products (RT-PCR) of the hMPV N protein region (199 bp) by  
599 agarose gel electrophoresis. Bands corresponding to culture supernatants of infected cells collected at  
600 4, 7 and 14 d.p.i. and positive controls (C+) are shown. Uninfected cells collected at the same times  
601 are included (C-). MPM: molecular weight marker. **D-** Images obtained with confocal microscopy,  
602 showing that the hMPV F protein accumulates near the nucleus at 48 h.p.i. **E-** Confocal microscopy  
603 images where viral proteins are observed at 0 and 96 h.p.i.. The bottom panel shows a transverse  
604 optical section where the viral label is evidenced in the cell cytoplasm decorating the MFLs. **F-** A  
605 maximum-likelihood tree (PhyML software) was constructed, using the GTR+G model with  
606 parameters suggested by JModelTest 3.7 with bootstraps and 1000 pseudoreplicates. A1: strains to  
607 hMPV subgroup A1. A2: strains to hMPV subgroup A2. B1: strains to hMPV subgroup B1. B2:  
608 strains to hMPV subgroup B2. Avian MPV (aMPV) was used to root the tree. The strain of interest is  
609 marked in bold. The scale bar indicates the changes between nucleotides. Scale bar: 20  $\mu$ m.

610

611 **Fig. 2. HMPV viral replication curve.** **A-** Quantification of intracellular and extracellular viral  
612 production through the cytoplasmic viral F protein (bars, left axis) and the number of copies of viral  
613 RNA in the extracellular medium (curve, right axis). Quantification was performed at 8, 16, 24, 48, 72  
614 and 96 h.p.i. **B-** Percentage of quantified infected cells was determined by the number of cells with or  
615 without fluorescent dots at 0, 8, 24, 48, and 72 h.p.i. **C-** Representative images of the temporal  
616 sequence of infection (0-96 h.p.i.). The hMPV F protein label (green) and nuclei (Hoesch-Blue) are

617 observed. Scale bar: 20  $\mu$ m. Results are the mean  $\pm$  SEM (one-way ANOVA with Tukey test post hoc  
618 test). \*\*\* p <0.0001 \*\* p <0.001 \* p <0.01.

619

620 **Fig. 3. Effect of disruption of Actin Microfilaments (MFLs) with CytD.** **A-** Images of CytD  
621 treatments in hMPV infected cells at different times of the growth curve: CytD during infection (2 h),  
622 8 h.p.i. and 24 h.p.i. Immunofluorescence performed with specific hMPV antibodies anti-protein F  
623 (green), MFLs (Phalloidin-Rho, red) and nuclei (Hoesch, blue). **B-** Percentage of infected cells after  
624 CytD treatment in relation to vehicle control. CytD treatment during infection (2 h): a significant  
625 increase was observed at 24 h.p.i. (0 h p= 0.6544; 24 h.p.i. p< 0.0001). CytD treatment during the first  
626 8 h.p.i.: a significant increase was observed at 24 h.p.i. (8 h.p.i. p= 0.0773; 24 h.p.i. p<0.0001). In  
627 CytD treatment during first 24 h.p.i. a significant increase was observed both at 24 and 72 h.p.i. (24  
628 h.p.i p<0.0001; 72 h.p.i. p<0.0001). **C-** Number of fluorescent dots per infected cell in CytD treatment  
629 and in controls. CytD treatment during infection (2 h): a significant increase was observed at 24 h.p.i.  
630 (0 h p= 0.9816; 24 h.p.i. p< 0.0001). CytD treatment during the first 8 h.p.i.: a significant increase was  
631 observed both at 8 and 24 h.p.i. (8 h.p.i p< 0.0001; 24 h.p.i. p< 0.0001). CytD treatment during the  
632 first 24 h.p.i.: a significant increase was observed at 72 h.p.i. (24 h.p.i. p= 0.3886; 72 h.p.i. p<0.0001).  
633 **D-** Quantification of extracellular viral RNA. CytD treatment during infection (2 h): a significant  
634 increase in RNA copies was observed at 24 h.p.i. (p<0.0001). CytD treatment during the first 8 h.p.i.  
635 caused a significant increase at 8 h.p.i. (p<0.0001). CytD treatment during the first 24 h.p.i. caused a  
636 significant decrease in extracellular viral RNA copies, remaining constant until 72 h.p.i. (p< 0.0001).  
637 Scale bar: 20  $\mu$ m. Results are the mean  $\pm$  SEM. Student unpaired *t* test was performed (\*\*\* =  
638 p<0.0001).

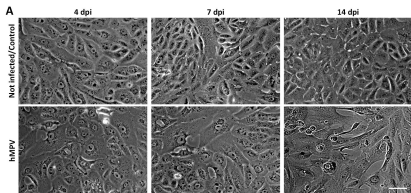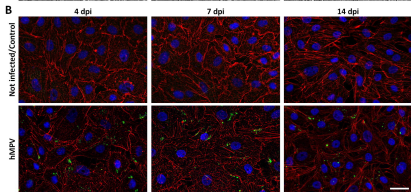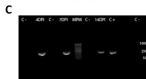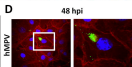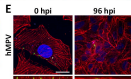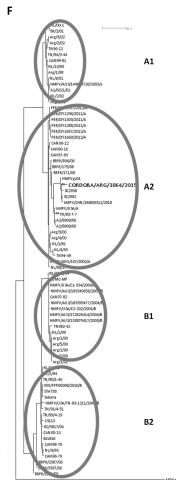

**A**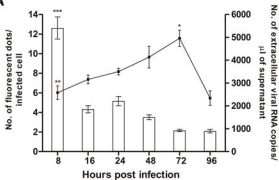**B**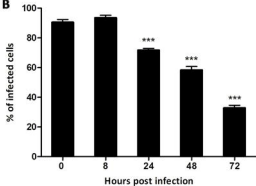**C**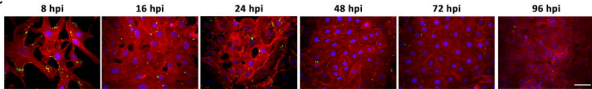

### CytD during infection 2 hs

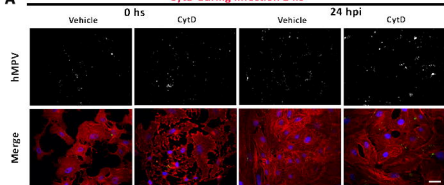

CytD during 8 hpi

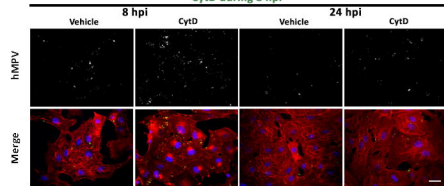

CytD during 24 hpi

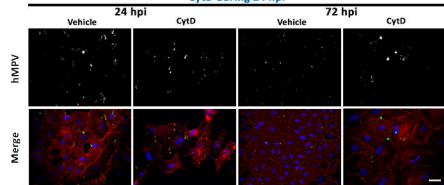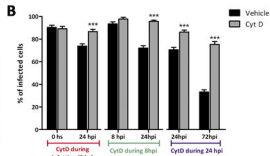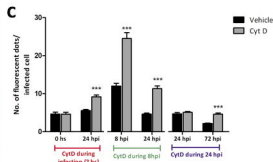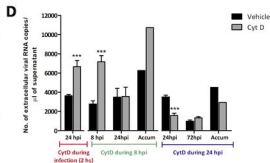

Source: https://www.biorxiv.org/content/10.1101/2022.09.30.510364v1.full.pdf
